# Supplementary material
Source: ML conference proceedings conference paper supplement (https://openreview.net/forum?id=2J51qUZ0iG)

$D_{eff}$  vs  $D_{opt}$  (Model Size: 1.2B)

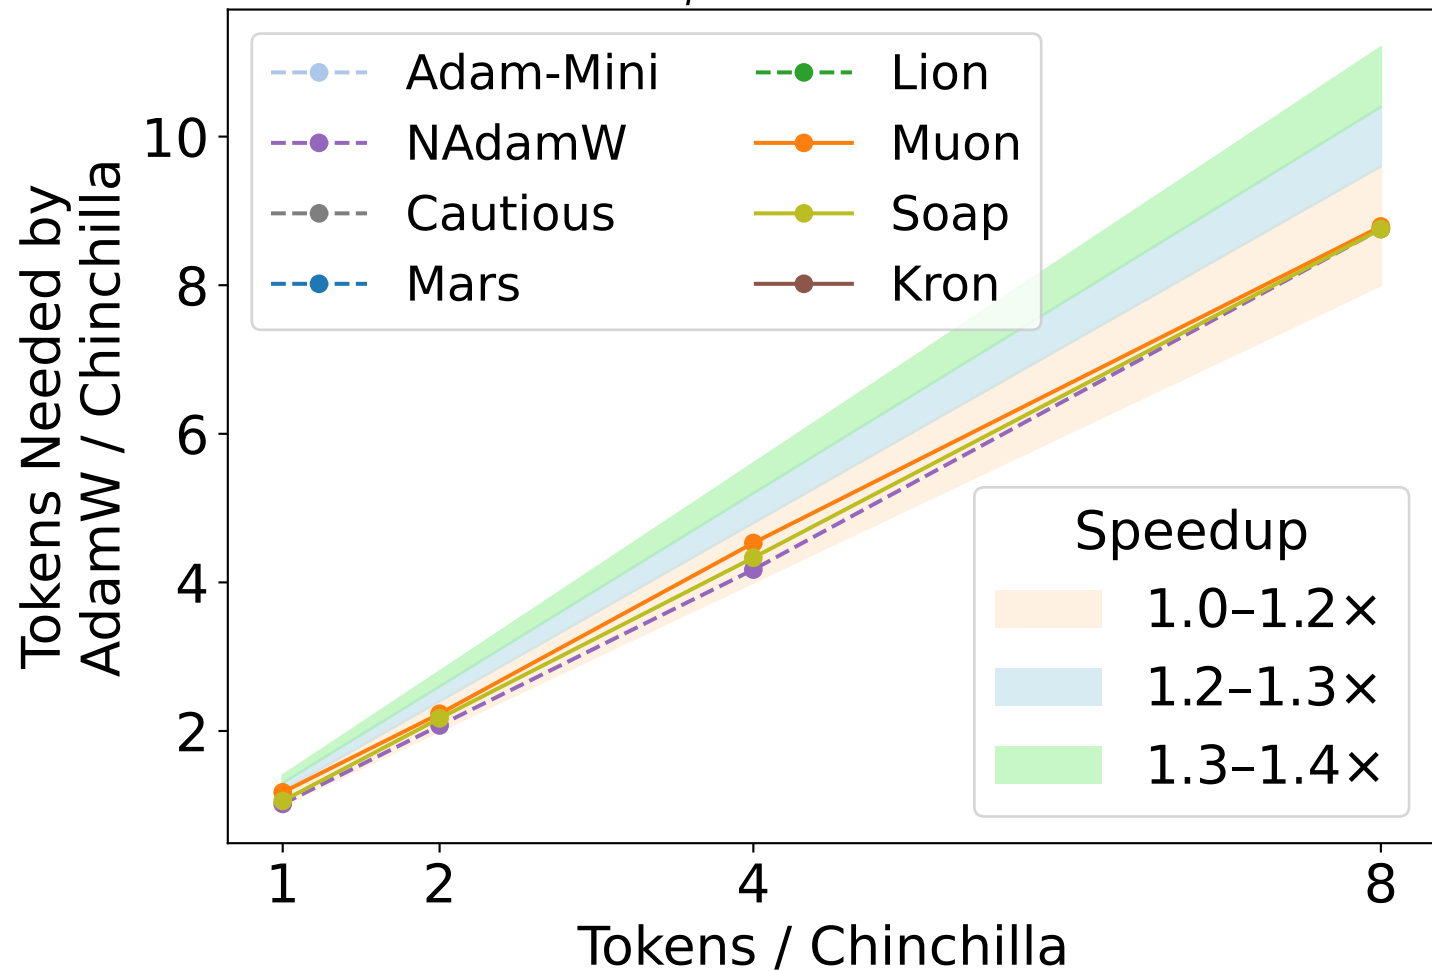

Supplement: supplementary_material [file D_eff_vs_D_opt_1.2b.pdf › supp/codebase/experiments/optimizer_sweep/Analysis/figs/D_eff_vs_D_opt_1.2b.pdf]

$D_{eff}$  vs  $D_{opt}$  (Model Size: 130M)

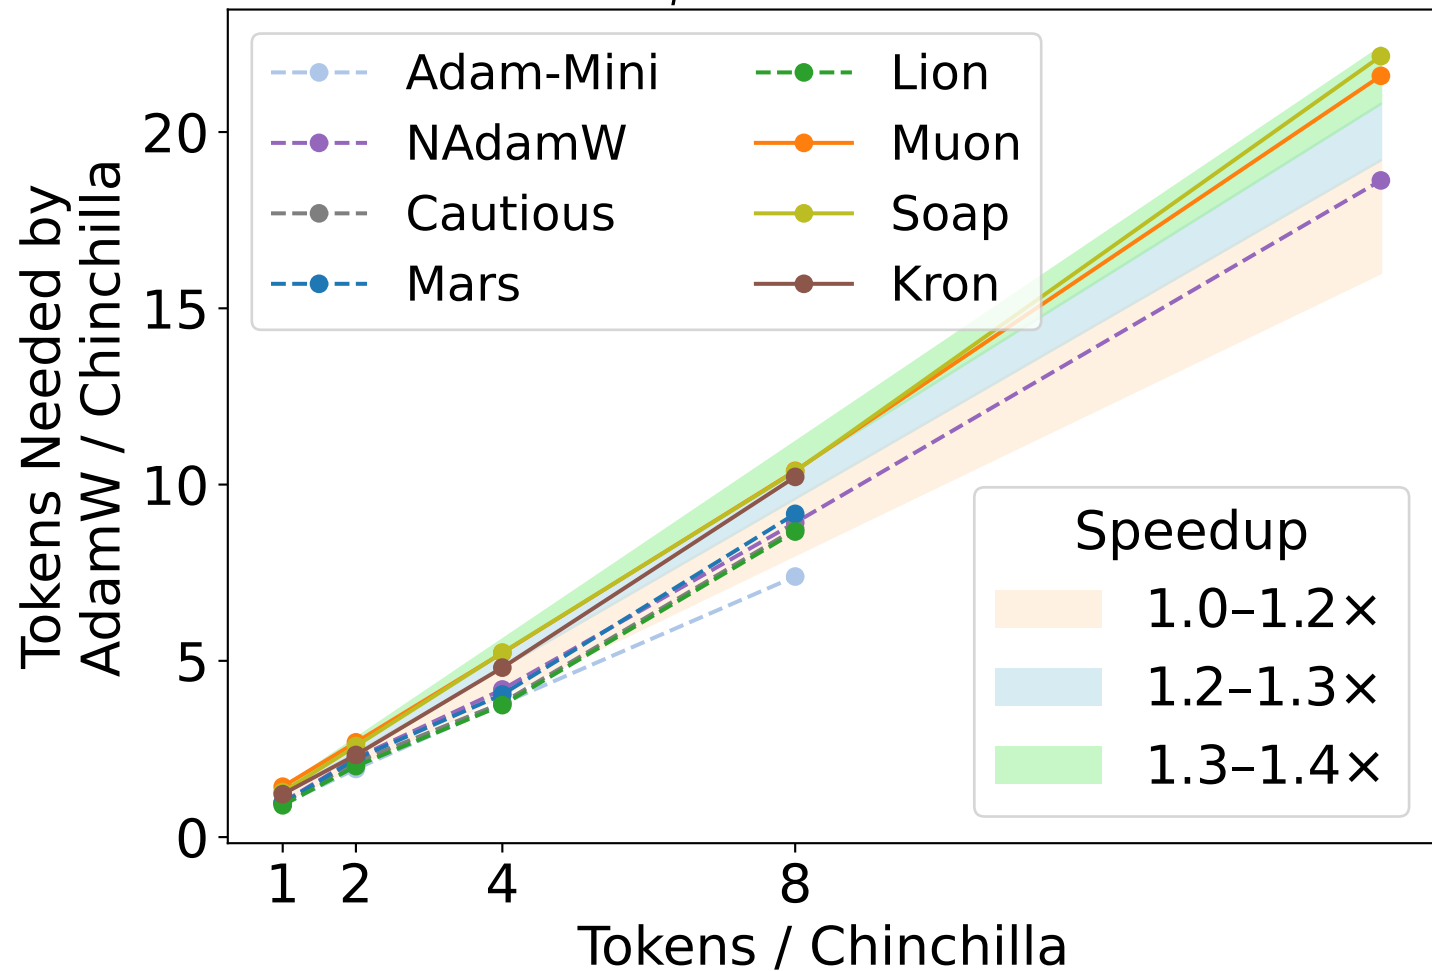

Supplement: supplementary_material [file D_eff_vs_D_opt_130m.pdf › supp/codebase/experiments/optimizer_sweep/Analysis/figs/D_eff_vs_D_opt_130m.pdf]

$D_{eff}$  vs  $D_{opt}$  (Model Size: 300M)

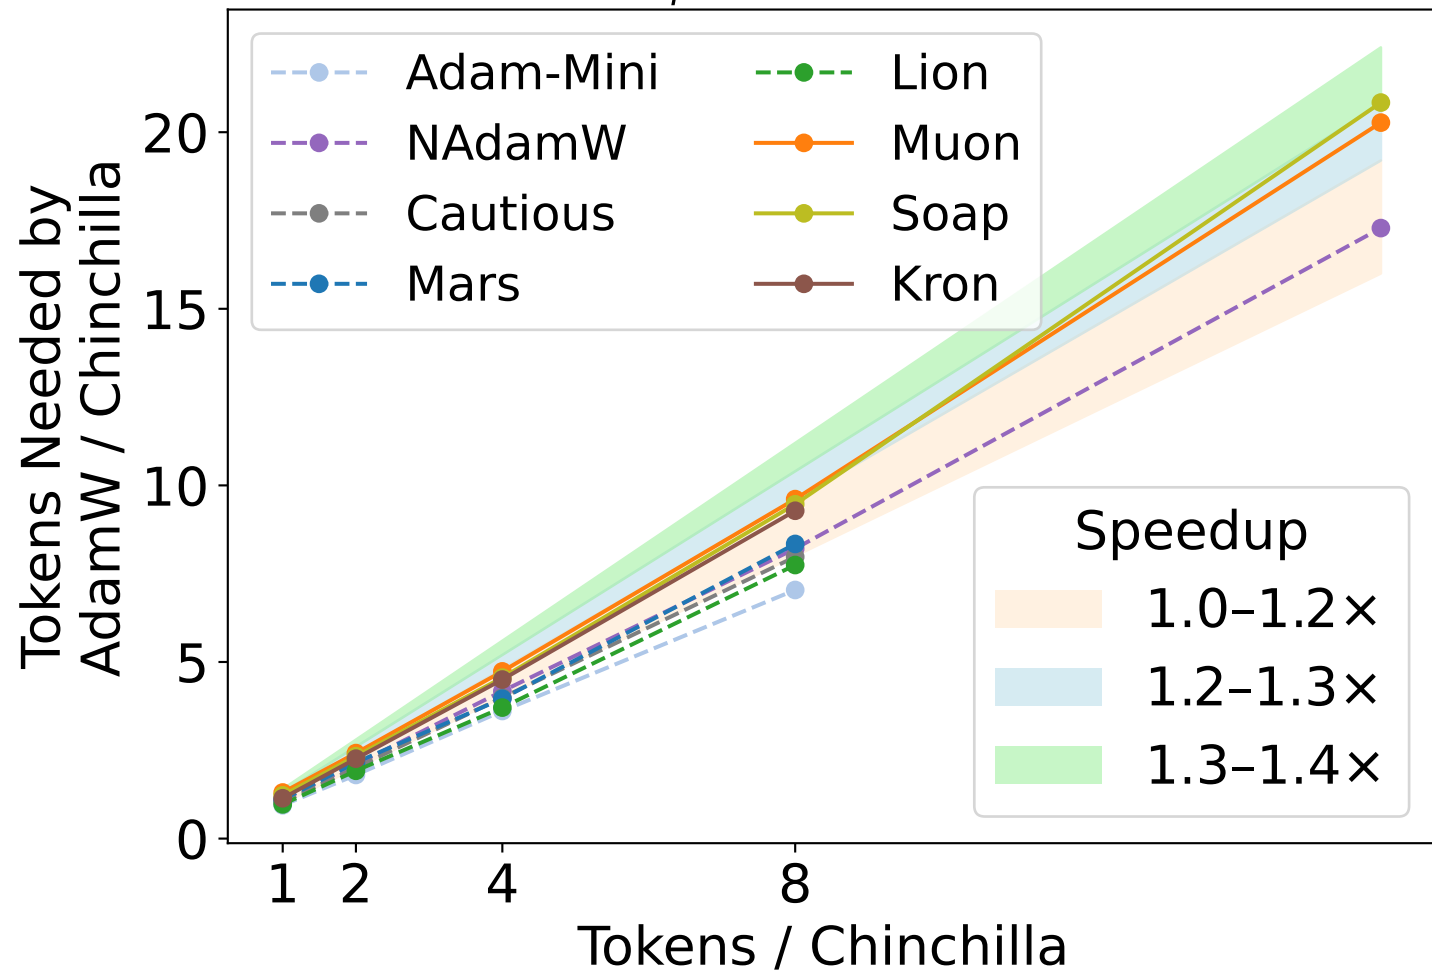

Supplement: supplementary_material [file D_eff_vs_D_opt_300m.pdf › supp/codebase/experiments/optimizer_sweep/Analysis/figs/D_eff_vs_D_opt_300m.pdf]

$D_{eff}$  vs  $D_{opt}$  (Model Size: 520M)

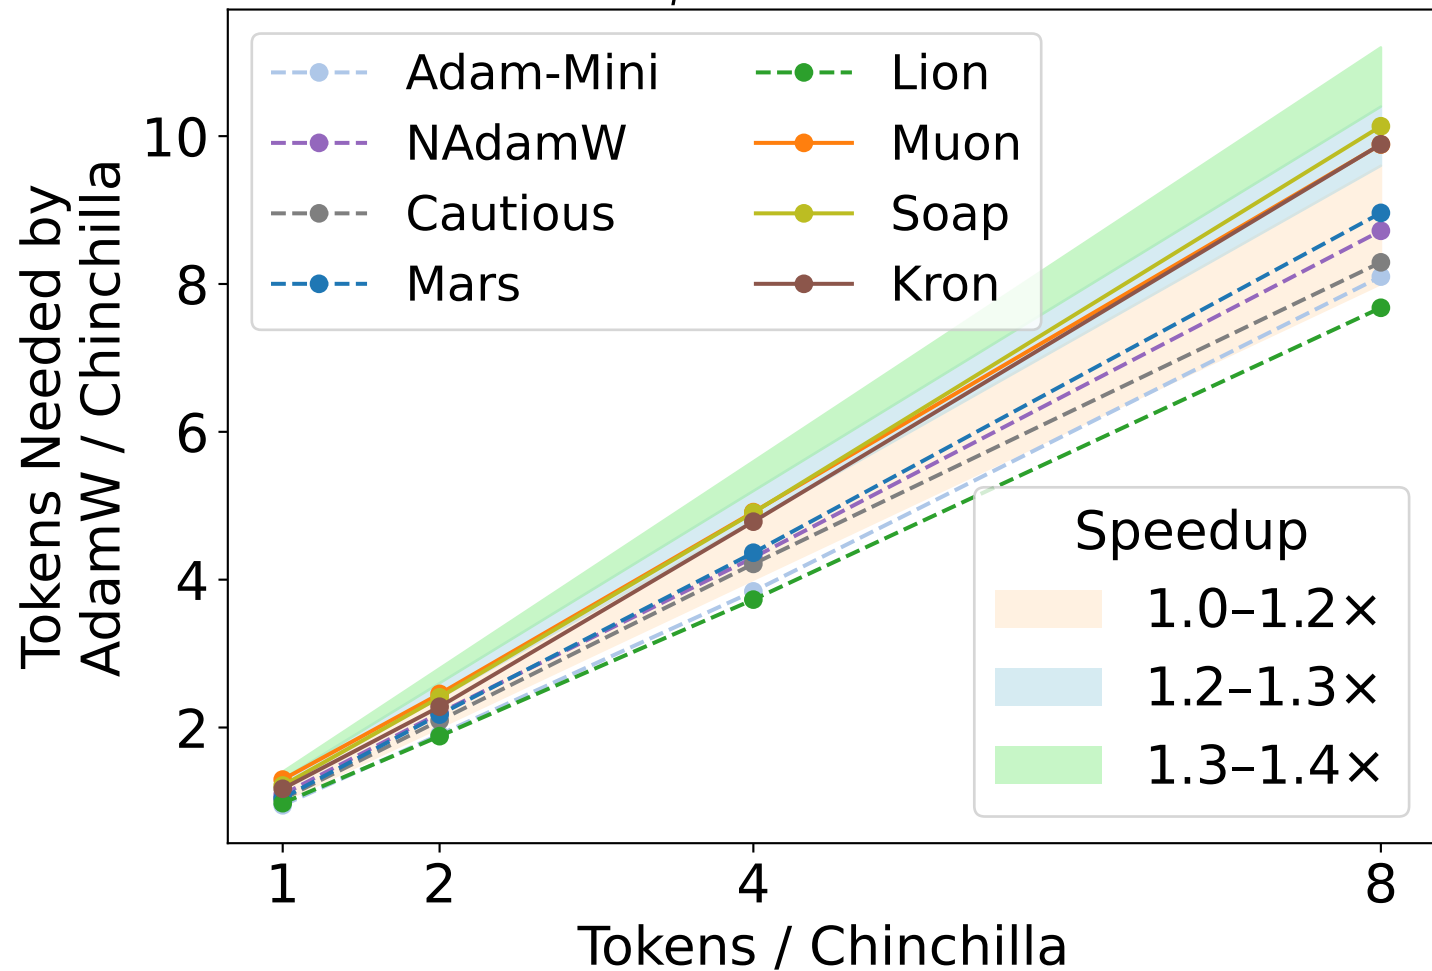

Supplement: supplementary_material [file D_eff_vs_D_opt_520m.pdf › supp/codebase/experiments/optimizer_sweep/Analysis/figs/D_eff_vs_D_opt_520m.pdf]

C4/EN Loss for 1.2B Model

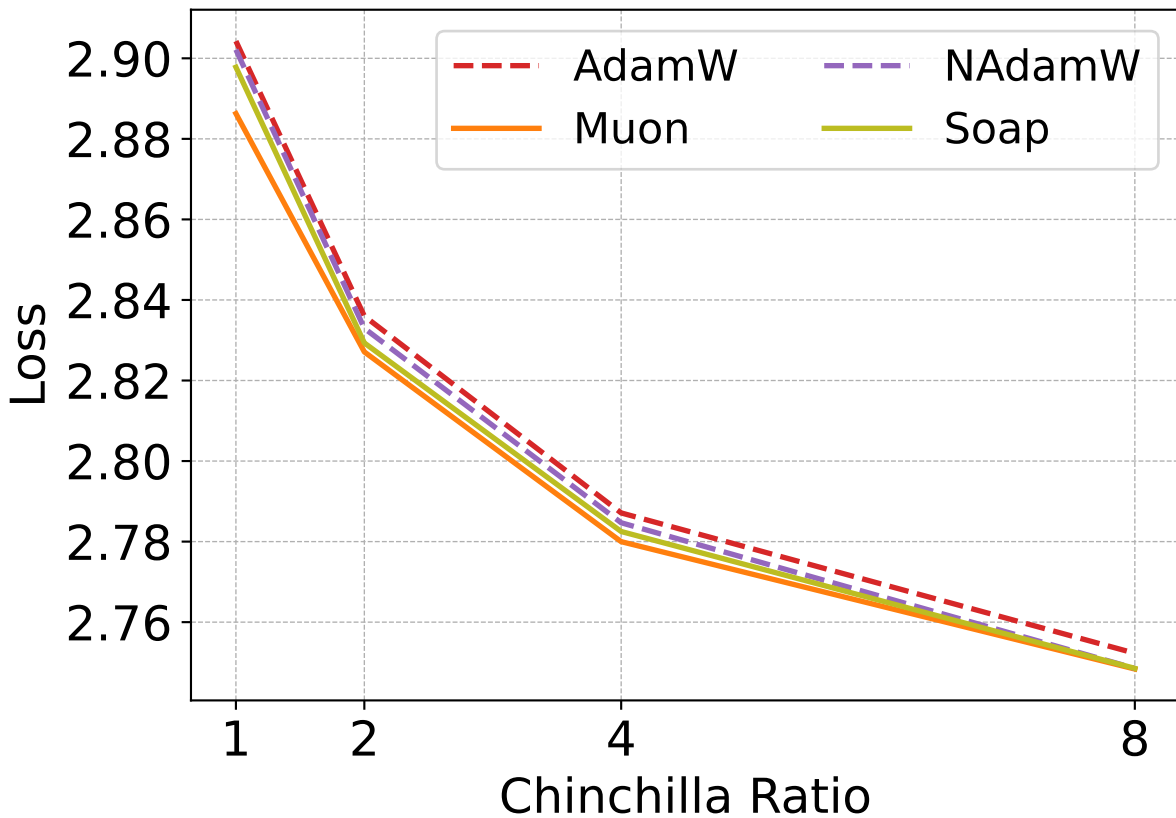

Supplement: supplementary_material [file optimizer_loss_scaling_1.2b.pdf › supp/codebase/experiments/optimizer_sweep/Analysis/figs/optimizer_loss_scaling_1.2b.pdf]

# C4/EN Loss for 130M Model

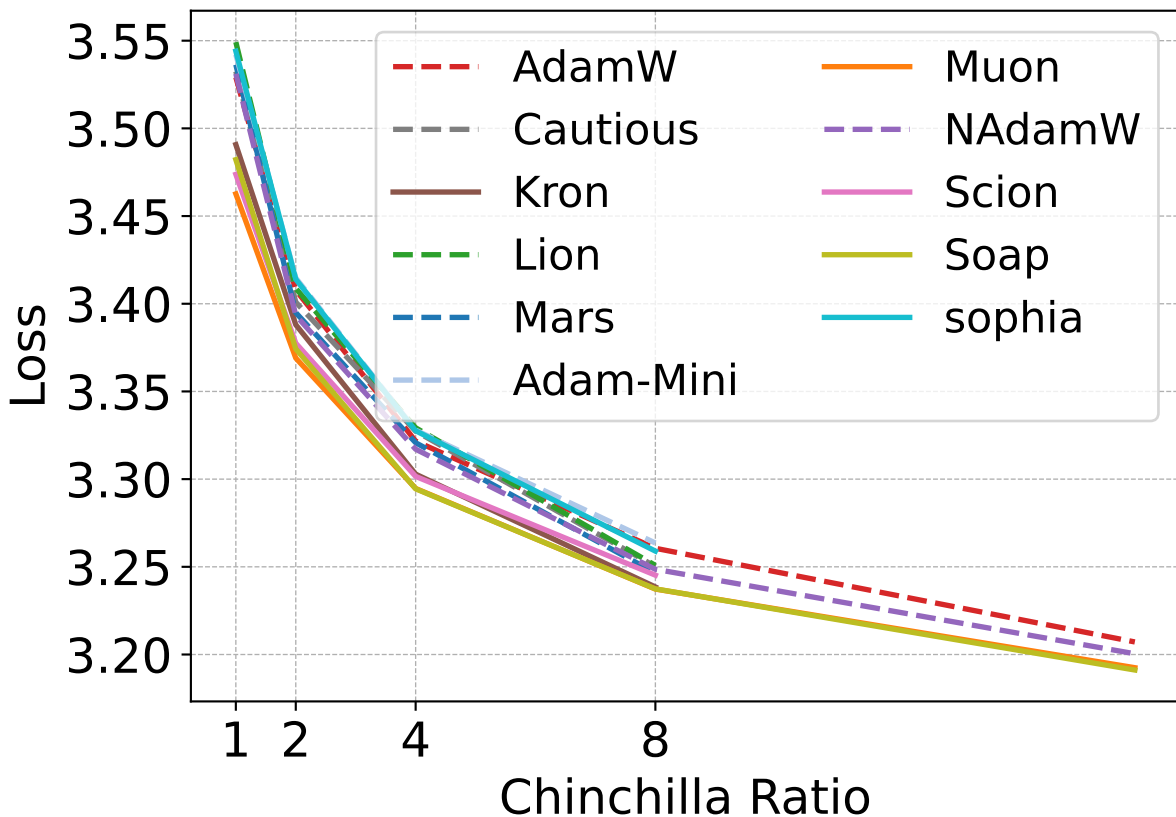

Supplement: supplementary_material [file optimizer_loss_scaling_130m.pdf › supp/codebase/experiments/optimizer_sweep/Analysis/figs/optimizer_loss_scaling_130m.pdf]

# C4/EN Loss for 300M Model

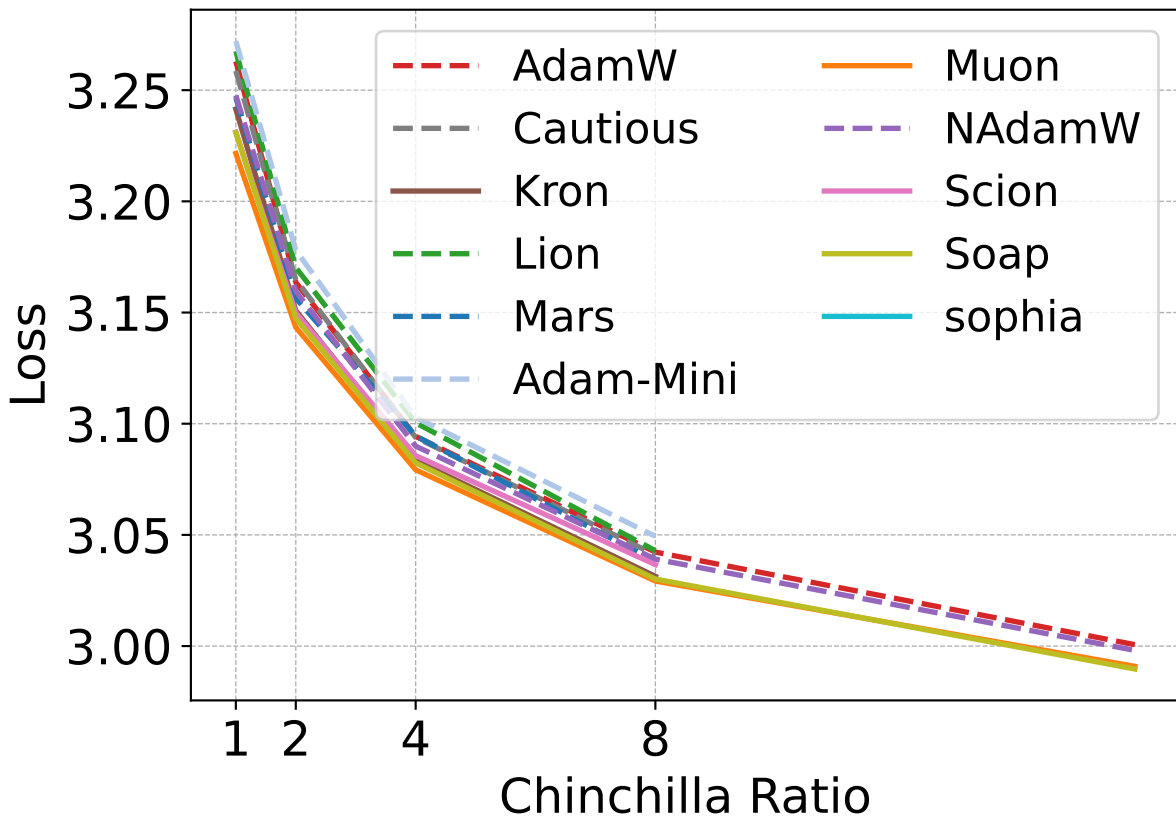

Supplement: supplementary_material [file optimizer_loss_scaling_300m.pdf › supp/codebase/experiments/optimizer_sweep/Analysis/figs/optimizer_loss_scaling_300m.pdf]

# C4/EN Loss for 520M Model

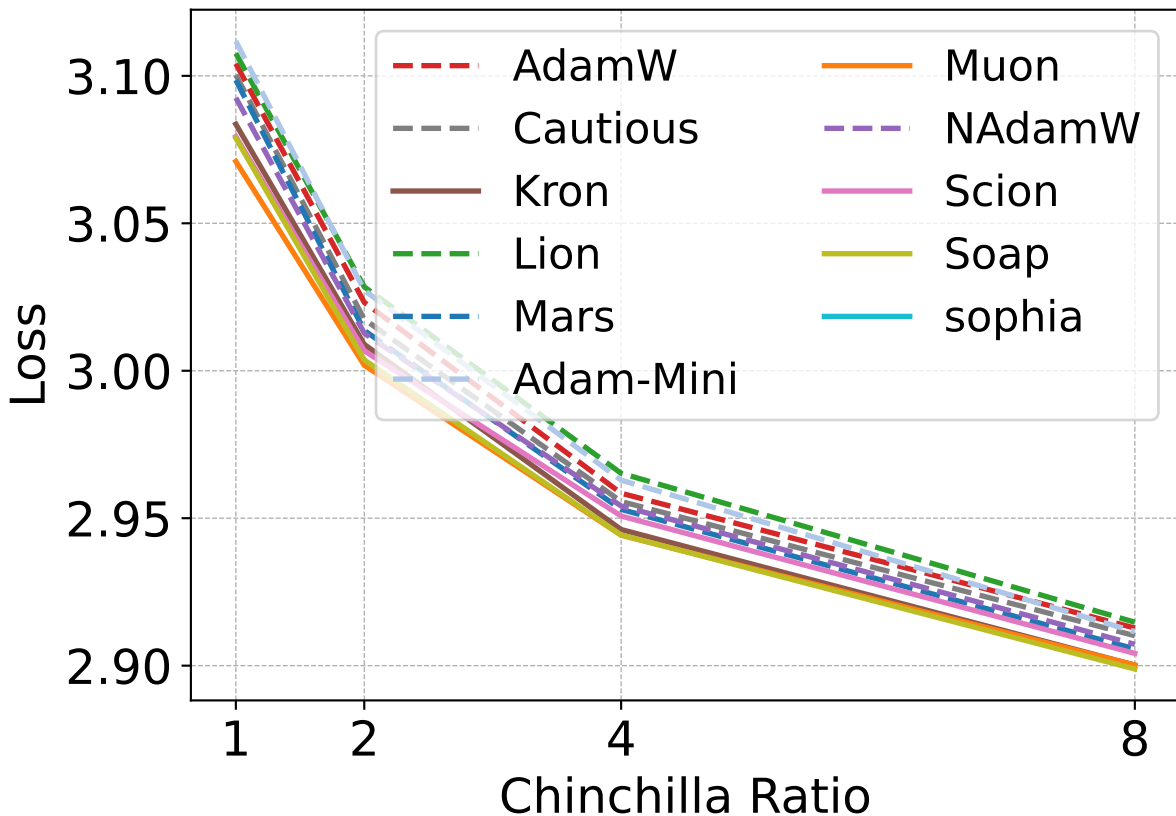

Supplement: supplementary_material [file optimizer_loss_scaling_520m.pdf › supp/codebase/experiments/optimizer_sweep/Analysis/figs/optimizer_loss_scaling_520m.pdf]

Loss \& Speedup vs Model Size (8x Chinchilla)

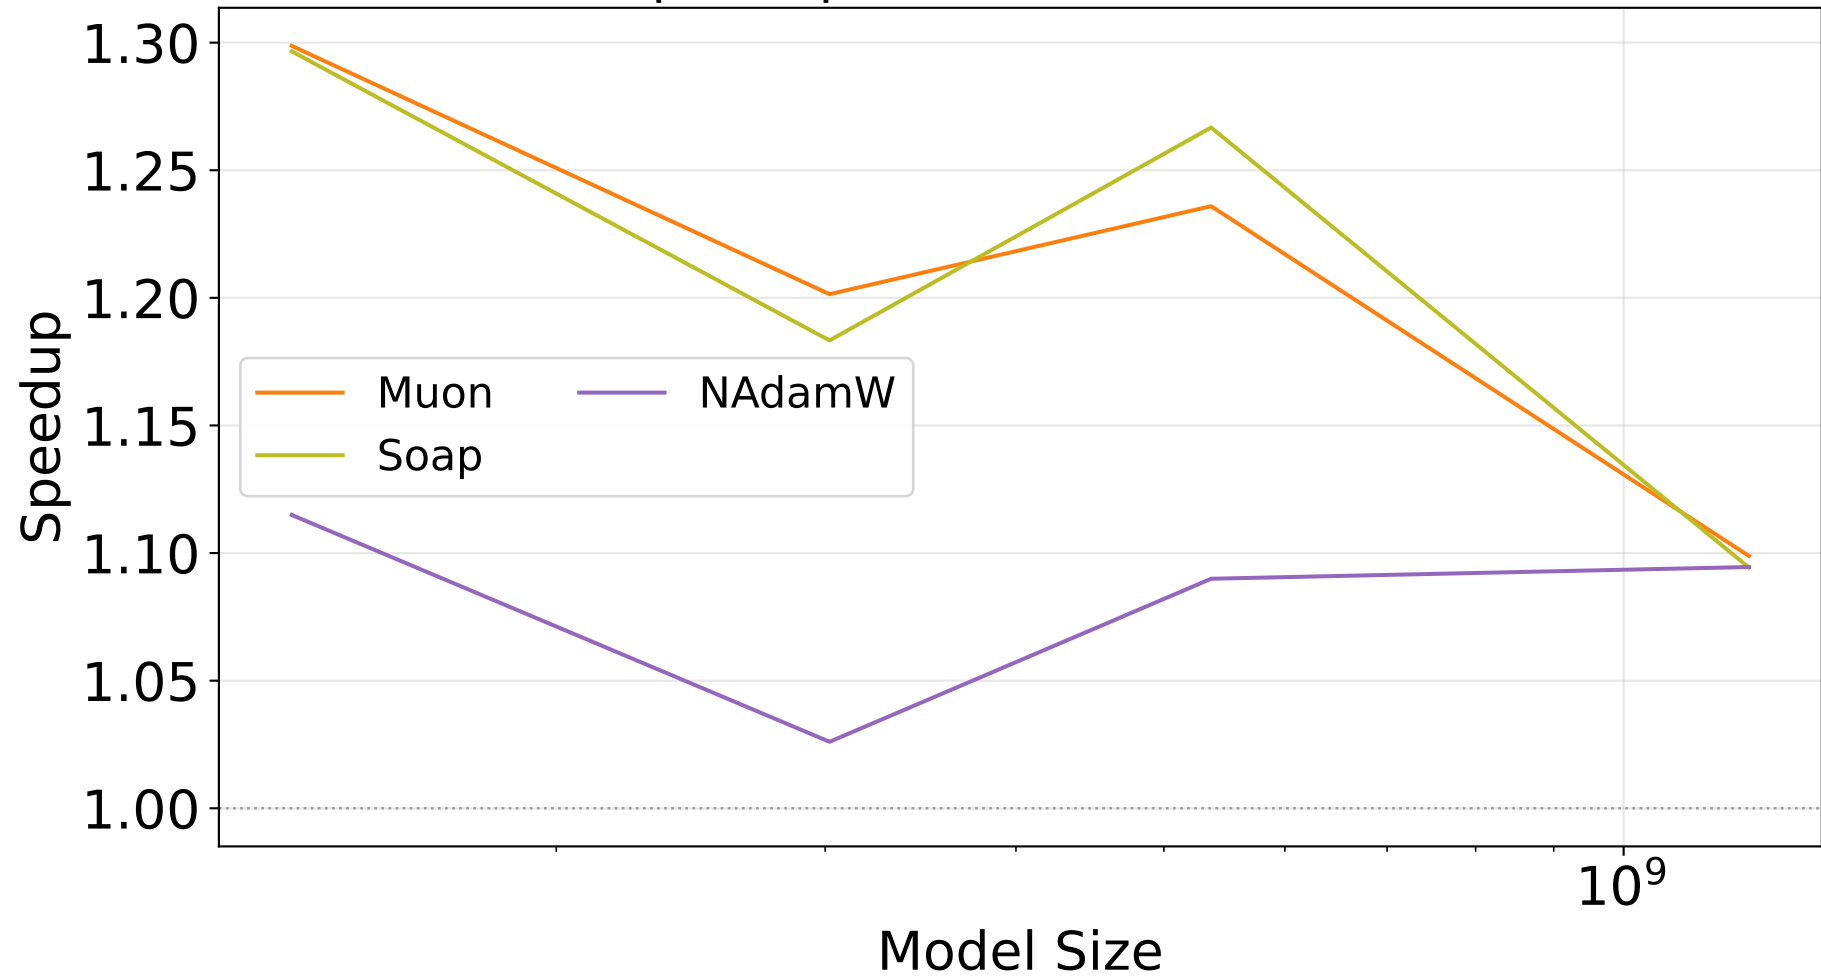

Supplement: supplementary_material [file speedup_vs_model_size.pdf › supp/codebase/experiments/optimizer_sweep/Analysis/figs/speedup_vs_model_size.pdf]
